# Supplementary material for: Deficiency in DNA Damage Repair Proteins Promotes Prostate Cancer Cell Migration through Oxidative Stress
Source: MDPI journal article supplement (doi:10.3390/onco4020005), 2024-03-28
Supplement: s1 [file s1]

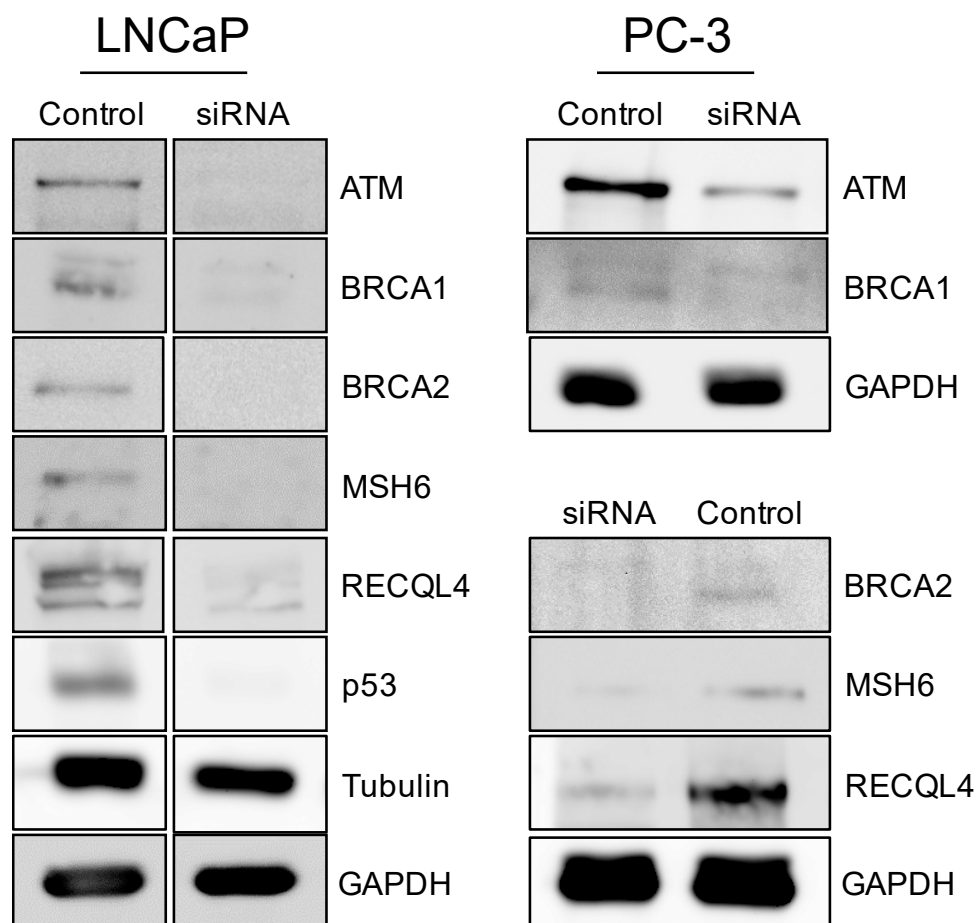

**Supplementary Figure 1.** Immunoblot analyses of siRNA-mediated knockdown of the proteins indicated. Tubulin or GAPDH were used as to demonstrate comparable loading of proteins.
